# Supplementary material for: LINC00963 Promotes Cancer Stemness, Metastasis, and Drug Resistance in Head and Neck Carcinomas via ABCB5 Regulation
Source: PubMed Central journal article supplement (PMC7281373; doi:10.3390/cancers12051073), 2020-04-26
Supplement: cancers-12-01073-s001.pdf [file cancers-12-01073-s001.pdf]

Article

# LINC00963 Promotes Cancer Stemness, Metastasis, and Drug Resistance in Head and Neck Carcinomas via ABCB5 Regulation

Shiao-Pieng Lee, Pei-Ling Hsieh, Chih-Yuan Fang, Pei-Ming Chu, Yi-Wen Liao, Chuan-Hang Yu, Cheng-Chia Yu and Lo-Lin Tsai

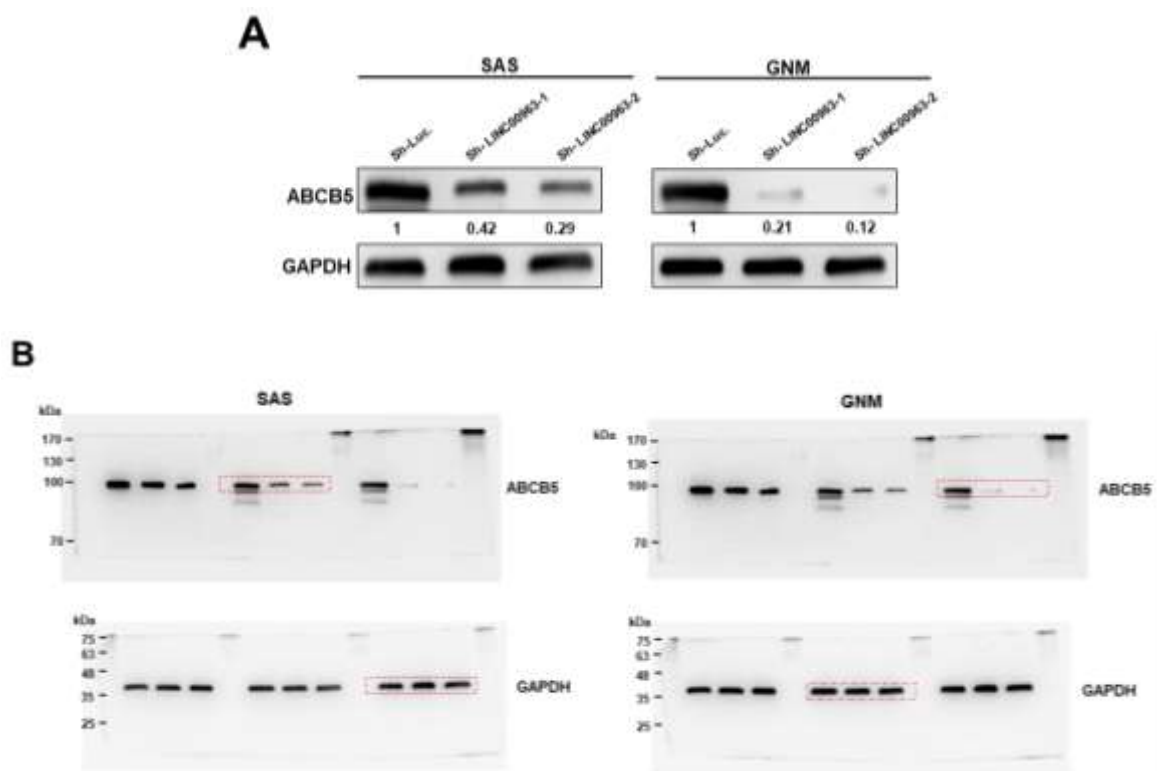

**Figure S1.** (A) Silencing LINC00963 decreased the expression of ABCB5 protein level in OSCC-CSC by western blotting. The amount of GAPDH protein of different crude cell extract was referred as loading control. (B) The whole blot (uncropped blots) of Supplementary Figure 1A.

**Table S1.** Clinicopathological parameters in OSCC patients.

| Parameters                               | Stage I and Stage II | Stage III and IV |
|------------------------------------------|----------------------|------------------|
| Age (years)                              | 38-59                | 34-60            |
| Mean age $\pm$ SD                        | 45.5 $\pm$ 8.1       | 50.3 $\pm$ 8.2   |
| Sex (M/F)                                | 10/1                 | 14/0             |
| Site                                     |                      |                  |
| Buccal mucosa                            | 4                    | 4                |
| Tongue                                   | 7                    | 9                |
| Other sites                              | 0                    | 1                |
| Histopathologic diagnosis                |                      |                  |
| Well differentiation cancer              | 8                    | 4                |
| Moderate and Poor differentiation cancer | 3                    | 10               |
